# Supplementary material for: Genetic predisposition in the 2′-5′A pathway in the development of type 1 diabetes: potential contribution to dysregulation of innate antiviral immunity
Source: PubMed Central journal article supplement (PMC8245375; doi:10.1007/s00125-021-05469-5), 2021-05-11
Supplement: 125_2021_5469_MOESM1_ESM.pdf [file 125_2021_5469_MOESM1_ESM.pdf]

ESM Table 1 Overview of the demographic features, HLA, autoantibody status, RNA integrity number (RIN) in all the individuals and patients used for the mRNA expression analysis from nPOD and DiViD studies.

**Demographic features of the patients**

|    | Patient code        | Age (years) | Sex    | Disease | Disease duration (years) | Source | BMI  | RIN | Age at diagnosis (years) |
|----|---------------------|-------------|--------|---------|--------------------------|--------|------|-----|--------------------------|
| 1  | IG1_6013-04PT(C)    | 65          | Male   | Control | 0                        | nPOD   | 24.2 | 5.1 | -                        |
| 2  | IG2_6024-01PT(C)    | 21          | Male   | Control | 0                        | nPOD   | 27.8 | 4.2 | -                        |
| 3  | IG3_6048-04PT(C)    | 30          | Male   | Control | 0                        | nPOD   | 20.6 | 4.6 | -                        |
| 4  | IG4_6075-06PB(C)    | 16          | Male   | Control | 0                        | nPOD   | 14.9 | 6.9 | -                        |
| 5  | IG5_6012-02PT(C)    | 68          | Female | Control | 0                        | nPOD   | 23.7 | 7.9 | -                        |
| 6  | IG6_6099-02PB(C)    | 14.2        | Male   | Control | 0                        | nPOD   | 30   | 5.2 | -                        |
| 7  | IG7_6140-04PT(C)    | 38          | Male   | Control | 0                        | nPOD   | 21.7 | 5.6 | -                        |
| 8  | IG8_6162-01PT(C)    | 22.7        | Male   | Control | 0                        | nPOD   | 28.9 | 4.1 | -                        |
| 9  | IG9_6168-04PT(C)    | 51          | Male   | Control | 0                        | nPOD   | 25.2 | 6.8 | -                        |
| 10 | IG10_6227-02PT(C)   | 17          | Female | Control | 0                        | nPOD   | 26.4 | 6   | -                        |
| 11 | IG11_6129-02PT(C)   | 42.9        | Female | Control | 0                        | nPOD   | 23.4 | 5.1 | -                        |
| 12 | IG12_6165-04PT(C)   | 45.8        | Female | Control | 0                        | nPOD   | 25   | 5.5 | -                        |
| 13 | IG13_6102-04PT(C)   | 45.1        | Female | Control | 0                        | nPOD   | 35.1 | 6.9 | -                        |
| 14 | IG14_6229-02PT(C)   | 31          | Female | Control | 0                        | nPOD   | 26.9 | 6.6 | -                        |
| 15 | IG15_6251-02PT(C)   | 33          | Female | Control | 0                        | nPOD   | 29.5 | 6.8 | -                        |
| 16 | IG16_6010-04PT(C)   | 47          | Female | Control | 0                        | nPOD   | 19.7 | 6.5 | -                        |
| 17 | IG17_6179-04B PB(C) | 20          | Female | Control | 0                        | nPOD   | 20.7 | 7   | -                        |
| 18 | IG18_6019-04PT(C)   | 42          | Male   | Control | 0                        | nPOD   | 31   | 4.8 | -                        |
| 1  | IG40_6080-01PT(AB)  | 69.2        | Female | Ab+     | 0                        | nPOD   | 21.3 | 6.2 | -                        |
| 2  | IG41_6123-02PT(AB)  | 23.2        | Female | Ab+     | 0                        | nPOD   | 17.6 | 4.9 | -                        |
| 3  | IG42_6158-10PT(AB)  | 40.3        | Male   | Ab+     | 0                        | nPOD   | 29.7 | 5.1 | -                        |
| 4  | IG43_6167-08PT(AB)  | 37          | Male   | Ab+     | 0                        | nPOD   | 26.3 | 4.7 | -                        |
| 5  | IG44_6171-01PT(AB)  | 4.4         | Female | Ab+     | 0                        | nPOD   | 14.8 | 4.4 | -                        |
| 6  | IG45_6044-02PT(AB)  | 41.4        | Male   | Ab+     | 0                        | nPOD   | 27.4 | 4.1 | -                        |
| 7  | IG46_6101-04PT(AB)  | 64.8        | Male   | Ab+     | 0                        | nPOD   | 34.3 | 5.8 | -                        |
| 8  | IG47_6154-06PT(AB)  | 48.5        | Female | Ab+     | 0                        | nPOD   | 24.5 | 5.8 | -                        |
| 9  | IG48_6156-06PT(AB)  | 40          | Male   | Ab+     | 0                        | nPOD   | 19.8 | 6.8 | -                        |
| 10 | IG49_6181-06APT(AB) | 31.9        | Male   | Ab+     | 0                        | nPOD   | 21.9 | 4.5 | -                        |

|    |                    |      |        |         |     |       |       |     |      |
|----|--------------------|------|--------|---------|-----|-------|-------|-----|------|
| 11 | IG50_6197-08PB(AB) | 22   | Male   | Ab+     | 0   | nPOD  | 28.2  | 6.6 | -    |
| 12 | IG51_6147-02PB(AB) | 23.8 | Female | Ab+     | 0   | nPOD  | 32.9  | 5.5 | -    |
| 1  | IG64_DiViD-6(Dg)   | 35   | Male   | New T1D | 0.1 | DiViD | 26.7  | 4   | 35   |
| 2  | IG65_DiViD-5(Dg)   | 24   | Female | New T1D | 0.1 | DiViD | 28.6  | 3.5 | 24   |
| 3  | IG66_DiViD-4(Dg)   | 31   | Male   | New T1D | 0.1 | DiViD | 25.6  | 4   | 31   |
| 4  | IG67_DiViD-3(Dg)   | 34   | Female | New T1D | 0.2 | DiViD | 23.7  | 7.3 | 34   |
| 5  | IG68_DiViD-2(Dg)   | 24   | Male   | New T1D | 0.1 | DiViD | 20.9  | 5.7 | 24   |
| 1  | IG20_6070-06PT(D1) | 22.6 | Female | T1D     | 7   | nPOD  | 21.6  | 5.2 | 15.6 |
| 2  | IG21_6084-02PT(D1) | 14.2 | Male   | T1D     | 4   | nPOD  | 26.3  | 4.2 | 10.2 |
| 3  | IG22_6088-02PH(D1) | 31.2 | Male   | T1D     | 5   | nPOD  | 27    | 6.2 | 26.2 |
| 4  | IG23_6180-04PT(D1) | 27.1 | Male   | T1D     | 11  | nPOD  | 25.9  | 4.3 | 16.1 |
| 5  | IG24_6224-01PT(D1) | 21   | Female | T1D     | 1.5 | nPOD  | 22.8  | 6   | 19.5 |
| 6  | IG25_6243-02PT(D1) | 13   | Male   | T1D     | 5   | nPOD  | 21.3  | 3.7 | 8    |
| 7  | IG26_6228-04PT(D1) | 13   | Male   | T1D     | 0   | nPOD  | 17.4  | 6.2 | 13   |
| 8  | IG27_6209-01PT(D1) | 5    | Female | T1D     | 0.3 | nPOD  | 11.95 | 3.8 | 4.8  |
| 9  | IG28_6038-06PH(D1) | 37.2 | Female | T1D     | 20  | nPOD  | 30.9  | 4.1 | 17.2 |
| 10 | IG29_6046-03PT(D1) | 18.8 | Female | T1D     | 8   | nPOD  | 25.2  | 5   | 10.8 |
| 11 | IG30_6069-06PT(D1) | 22.9 | Male   | T1D     | 7   | nPOD  | 28.8  | 5   | 15.9 |
| 12 | IG31_6195-06PT(D1) | 19.2 | Male   | T1D     | 5   | nPOD  | 23.7  | 5.1 | 14.2 |
| 13 | IG32_6052-03PB(D1) | 12   | Male   | T1D     | 1   | nPOD  | 20.3  | 5   | 11   |
| 14 | IG33_6268-02PT(D1) | 12   | Female | T1D     | 3   | nPOD  | 26.6  | 6.1 | 9    |
| 15 | IG34_6265-02PH(D1) | 11   | Male   | T1D     | 8   | nPOD  | 12.9  | 3.9 | 3    |
| 16 | IG35_6196-04PT(D1) | 26   | Female | T1D     | 15  | nPOD  | 26.6  | 7.8 | 11   |
| 17 | IG36_6211-04PT(D1) | 24   | Female | T1D     | 4   | nPOD  | 24.4  | 4.7 | 20   |
| 18 | IG37_6113-01PH(D1) | 13.1 | Female | T1D     | 1.6 | nPOD  | 24.8  | 4.9 | 11.5 |
| 19 | IG38_6264-02PB(D1) | 12   | Female | T1D     | 9   | nPOD  | 22    | 5.4 | 3    |
| 20 | IG39_6135-01PT(D1) | 43.5 | Male   | T1D     | 21  | nPOD  | 28.7  | 7.4 | 22.5 |
| 1  | IG56_6188-06PT(D2) | 36.1 | Male   | T2D     | 0   | nPOD  | 30.6  | 6.1 | 36.1 |
| 2  | IG57_6114-03PT(D2) | 42.8 | Male   | T2D     | 2   | nPOD  | 31    | 6.6 | 40.8 |
| 3  | IG58_6249-01PT(D2) | 45   | Female | T2D     | 15  | nPOD  | 32.3  | 7.4 | 30   |
| 4  | IG59_6275-02PT(D2) | 48   | Male   | T2D     | 2   | nPOD  | 41    | 6.4 | 46   |
| 5  | IG60_6273-04PT(D2) | 45   | Female | T2D     | 2   | nPOD  | 39.1  | 6.1 | 43   |
| 6  | IG61_6191-01PT(D2) | 62.7 | Female | T2D     | 10  | nPOD  | 19.9  | 8.1 | 52.7 |

|   |                    |      |        |     |     |      |      |     |      |
|---|--------------------|------|--------|-----|-----|------|------|-----|------|
| 7 | IG62_6059-06PT(D2) | 18.8 | Female | T2D | 0.3 | nPOD | 39.3 | 6.1 | 18.6 |
| 8 | IG63_6110-05PT(D2) | 20.7 | Female | T2D | 0   | nPOD | 40   | 5.9 | 20.7 |

### HLA and autoantibody status

|    | Patient             | Autoantibody Status | HLA Risk     | HLA-A         | HLA-B         | HLA-DRB1      | HLA-DQB1      | HbA1c | HbA1c (mmol/mol) |
|----|---------------------|---------------------|--------------|---------------|---------------|---------------|---------------|-------|------------------|
| 1  | IG1_6013-04PT(C)    | Negative            | Neutral      | *01:01/01:01  | *07:02/44:03  | *01:02/13:01  | *05:01/06:03  | 0     | -                |
| 2  | IG2_6024-01PT(C)    | Negative            | Predisposing | *01:01/31:01  | *07:02/08:01  | *03:01/13:02  | *02:01/06:04  | 0     | -                |
| 3  | IG3_6048-04PT(C)    | Negative            | Protective   | *03:01/31:01  | *07:02/47:01  | *04:01/15:01  | *03:01/06:02  | 0     | -                |
| 4  | IG4_6075-06PB(C)    | Negative            | Neutral      | *23:01/33:03  | *15:03/58:01  | *07:01/11:01  | *02:01/03:01  | 0     | -                |
| 5  | IG5_6012-02PT(C)    | Negative            | Protective   | *02:01/02:01  | *07:02/57:01  | *07:01/15:01  | *03:03/06:02  | 0     | -                |
| 6  | IG6_6099-02PB(C)    | Negative            | Predisposing | *24:02/26:01  | *27:03/44:05  | *03:01/11:01  | *02:01/03:01  | 0     | -                |
| 7  | IG7_6140-04PT(C)    | Negative            | Predisposing | *01:01/03:01  | *35:01/35:01  | *01:01/03:01  | *02:01/05:01  | 6     | 42.1             |
| 8  | IG8_6162-01PT(C)    | Negative            | Neutral      | * 25:01/68:02 | NA            | * 13:03/16:02 | * 03:01/05:02 | 0     | -                |
| 9  | IG9_6168-04PT(C)    | Not tested          | Predisposing | *02:01/24:02  | NA            | *01:03/04:04  | *03:02/05:01  | 6.2   | 44.3             |
| 10 | IG10_6227-02PT(C)   | Negative            | Predisposing | *02:01/03:01  | NA            | *04:01/13:02  | *03:02/06:04  | 0     | -                |
| 11 | IG11_6129-02PT(C)   | Negative            | Protective   | *03:01/23:01  | *07:02/14:02  | *03:01/15:01  | *02:01/06:02  | 5.2   | 33.3             |
| 12 | IG12_6165-04PT(C)   | Negative            | Protective   | *01:01/02:01  | NA            | *13:01/15:01  | *06:02/06:03  | 5.6   | 37.7             |
| 13 | IG13_6102-04PT(C)   | Negative            | Predisposing | *03:01/31:01  | *08:01/44:02  | *03:01/04:01  | *02:01/03:01  | 6.1   | 43.2             |
| 14 | IG14_6229-02PT(C)   | Negative            | Neutral      | *02:01/24:02  | NA            | *01:01/13:02  | *05:04/06:04  | 5.5   | 36.6             |
| 15 | IG15_6251-02PT(C)   | Negative            | Neutral      | *02:01/24:02  | NA            | *04:01/11:01  | *03:01/03:01  | 5.3   | 34.4             |
| 16 | IG16_6010-04PT(C)   | Not tested          | Protective   | * 02:01/02:01 | * 07:02/57:01 | * 07:01/15:01 | * 03:03/06:02 | 0     | -                |
| 17 | IG17_6179-04B PB(C) | Negative            | Predisposing | *02:01/24:02  | NA            | *03:01/04:04  | *02:01/03:02  | 0     | -                |
| 18 | IG18_6019-04PT(C)   | Negative            | Predisposing | *faint. faint | *faint. faint | *01:01/03:01  | *02:01/05:01  | 5.6   | 37.7             |
| 1  | IG40_6080-01PT(AB)  | GADA+/mIAA          | Neutral      | *02:01/11:01  | *35:01/44:02  | *01:01/04:01  | *03:01/05:01  | 0     | -                |
| 2  | IG41_6123-02PT(AB)  | GADA+               | Neutral      | *02:01/24:02  | *35:01/51:01  | *08:01/11:01  | *03:01/04:02  | 5.4   | 35.5             |
| 3  | IG42_6158-10PT(AB)  | GADA+/IA2A+         | Neutral      | *03:01/24:02  | *15:01/49:01  | *04:01/13:02  | *03:01/06:04  | 5.6   | 37.7             |
| 4  | IG43_6167-08PT(AB)  | IA2A+/ZnT8A+        | Predisposing | *01:01/03:01  | NA            | *04:04/15:02  | *03:02/06:01  | 0     | -                |
| 5  | IG44_6171-01PT(AB)  | GADA+               | Predisposing | *02:01/31:01  | NA            | *03:01/03:01  | *02:01/02:01  | 0     | -                |
| 6  | IG45_6044-02PT(AB)  | IA2A+               | Protective   | *01:01/33:01  | *14:02/37:01  | *01:02/15:01  | *05:01/06:02  | 0     | -                |
| 7  | IG46_6101-04PT(AB)  | GADA+               | Protective   | *02:01/32:01  | *44:02/51:01  | *13:02/15:01  | *06:02/06:04  | 0     | -                |
| 8  | IG47_6154-06PT(AB)  | GADA+               | Protective   | *02:01/03:01  | *07:02/07:02  | *09:01/15:01  | *03:03/06:03  | 0     | -                |
| 9  | IG48_6156-06PT(AB)  | GADA+               | Neutral      | *03:01/32:01  | *40:02/53:01  | *01:01/01:02  | *05:01/05:01  | 0     | -                |
| 10 | IG49_6181-06APT(AB) | GADA+               | Predisposing | *03:01/11:01  | NA            | *01:01/04:01  | *03:02/05:01  | 0     | -                |
| 11 | IG50_6197-08PB(AB)  | GADA+/IA2A+         | Neutral      | *02:02/24:02  | NA            | *03:02/07:01  | *02:02/04:02  | 5.5   | 36.6             |

|    |                    |                          |              |              |              |              |              |      |       |
|----|--------------------|--------------------------|--------------|--------------|--------------|--------------|--------------|------|-------|
| 12 | IG51_6147-02PB(AB) | GADA+                    | Neutral      | *02:01/02:01 | *08:01/15:01 | *03:01/04:01 | *03:01/04:02 | 5.2  | 33.3  |
| 1  | IG64_DiViD-6(Dg)   | GAD                      |              | *0101.*2902  | *0801.*4403  | *0301.*0701  | *0201.*0202  | 7.1  | 54.1  |
| 2  | IG65_DiViD-5(Dg)   | GAD/INS/IA2              |              | *0201.*0301  | *1801.*4001  | *0301.*0401  | *0201.*0302  | 7.4  | 57.4  |
| 3  | IG66_DiViD-4(Dg)   | GAD/INS/IA2              |              | *0201        | *1501.*3501  | *0401        | *0302        | 7.4  | 57.4  |
| 4  | IG67_DiViD-3(Dg)   | GAD/ZnT8/IA2             |              | *0101.*2402  | *0801.*1501  | *0301.*0401  | *0201.*0302  | 7.1  | 54.1  |
| 5  | IG68_DiViD-2(Dg)   | GAD/ZnT8/IA2             |              | *0201.*1101  | *1801.*4001  | *0401.*1301  | *0302.*0603  | 10.3 | 89.1  |
| 1  | IG20_6070-06PT(D1) | IA2A+/mIAA               | Neutral      | *02:01/02:05 | *38:01/58:01 | *10:01/16:01 | *05:01/05:02 | 0    | -     |
| 2  | IG21_6084-02PT(D1) | mIAA+                    | Predisposing | *01:01/32:01 | *08:01/40:01 | *03:01/04:01 | *02:01/03:02 | 0    | -     |
| 3  | IG22_6088-02PH(D1) | GADA+/IA2A+/ZnT8A+/mIAA+ | Predisposing | *02:01/33:01 | *14:02/51:01 | *01:01/03:01 | *02:01/05:01 | 0    | -     |
| 4  | IG23_6180-04PT(D1) | GADA+/IA2A+/ZnT8A+/mIAA+ | Predisposing | *01:01/02:01 | NA           | *01:01/03:01 | *02:01/05:01 | 0    | -     |
| 5  | IG24_6224-01PT(D1) | Negative                 | Predisposing | *02:01/11:01 | NA           | *01:01/04:04 | *03:02/05:01 | 0    | -     |
| 6  | IG25_6243-02PT(D1) | mIAA+                    | Predisposing | *01:01/02:01 | NA           | *03:01/03:01 | *02:01/02:01 | 13.1 | 119.7 |
| 7  | IG26_6228-04PT(D1) | GADA+/IA2A+/ZnT8A+       | Predisposing | *23:01/68:01 | NA           | *03:01/04:02 | *02:01/03:02 | 13.3 | 121.9 |
| 8  | IG27_6209-01PT(D1) | IA2A+/ZnT8A+/mIAA        | Predisposing | *01:01/02:01 | NA           | *04:01/03:01 | *03:02/02:01 | 0    | -     |
| 9  | IG28_6038-06PH(D1) | Negative                 | Predisposing | *02:01/03:01 | *35:01/44:05 | *01:01/03:01 | *02:01/05:01 | 0    | -     |
| 10 | IG29_6046-03PT(D1) | IA2A+/ZnT8A+             | Predisposing | *02:01/03:01 | *15:01/39:01 | *01:01/04:01 | *03:02/05:01 | 0    | -     |
| 11 | IG30_6069-06PT(D1) | Not tested               | Predisposing | *02:01/02:01 | *51:02/58:01 | *03:01/12:02 | *02:01/03:01 | 0    | -     |
| 12 | IG31_6195-06PT(D1) | GADA+/IA2A+/ZnT8A+/mIAA+ | Neutral      | *03:01/03:01 | NA           | *04:01/15:01 | *03:02/06:02 | 0    | -     |
| 13 | IG32_6052-03PB(D1) | IA2A+/mIAA+              | Neutral      | *02:01/68:01 | *27:05/50:01 | *09:01/16:02 |              | 0    | -     |
| 14 | IG33_6268-02PT(D1) | mIAA+                    | Predisposing | *02:01/68:01 | NA           | *03:01/13:02 | *02:01/06:04 | 9.8  | 83.6  |
| 15 | IG34_6265-02PH(D1) | GADA+/mIAA+              | Predisposing | *03:01/32:01 | NA           | *03:01/04:01 | *02:01/03:02 | 0    | -     |
| 16 | IG35_6196-04PT(D1) | GADA+/mIAA+              | Neutral      | *03:01/30:02 | NA           | *12:01/13:03 | *02:01/05:01 | 0    | -     |
| 17 | IG36_6211-04PT(D1) | GADA+/IA2A+/ZnT8A+/mIAA+ | Predisposing | *02:01/03:01 | NA           | *04:05/12:01 | *03:01/03:02 | 10.5 | 91.3  |
| 18 | IG37_6113-01PH(D1) | mIAA+                    | Predisposing | *02:01/03:01 | *08:01/44:02 | *01:01/03:01 | *02:01/05:01 | 0    | -     |
| 19 | IG38_6264-02PB(D1) | Negative                 | Predisposing | *23:01/32:01 | NA           | *03:01/04:04 | *02:01/03:02 | 8.9  | 73.8  |
| 20 | IG39_6135-01PT(D1) | mIAA+                    | Neutral      | *02:01/68:01 | *27:05/51:01 | *01:01/13:02 | *05:01/06:04 | 0    | -     |
| 1  | IG56_6188-06PT(D2) | Negative                 | Neutral      | *02:02/66:01 | NA           | *12:01/14:01 | *03:01/06:04 | 7.2  | 55.2  |
| 2  | IG57_6114-03PT(D2) | Negative                 | Protective   | *03:01/31:01 | *07:02/15:01 | *07:01/15:01 | *03:03/06:02 | 7.8  | 61.7  |
| 3  | IG58_6249-01PT(D2) | mIAA+                    | Predisposing | *02:01/24:02 | NA           | *04:05/04:05 | *04:02/04:02 | 0    | -     |
| 4  | IG59_6275-02PT(D2) | Negative                 | Protective   | *02:01/25:01 | NA           | *09:01/15:01 | *03:03/06:02 | 0    | -     |
| 5  | IG60_6273-04PT(D2) | Negative                 | Protective   | *02:02/03:01 | NA           | *15:01/15:03 | *06:02/06:02 | 0    | -     |
| 6  | IG61_6191-01PT(D2) | Negative                 | Predisposing | *01:01/02:01 | NA           | *04:01/07:01 | *02:02/03:02 | 6    | 42.1  |
| 7  | IG62_6059-06PT(D2) | Negative                 | Neutral      | *02:01/11:01 | *35:01/50:01 | *07:01/08:02 | *02:01/04:02 | 0    | -     |
| 8  | IG63_6110-05PT(D2) | Negative                 | Neutral      | *23:01/34:02 | *14:02/53:01 | *03:02/15:03 | *04:02/06:02 | 0    | -     |

ESM Table 2: SNPs associated with T1D. First three columns show SNP number, chromosome placement, and position. Both the p value without Q-value filtering (column four) and with eQTL p values were shown (last three columns). <sup>a</sup> Indicate genes that also showed dysregulation on RNA expression level. <sup>b</sup> Newly discovered in association with T1D.

| SNP                     | CHR   | POS(GRCh38) | T1D<br>ImmunoChip<br>P-value | OR<br>(MinAllele) | Maj>Min<br>allele | Associated<br>Gene  | RegulomeDb<br>Rank | Validated e-QTLs:<br>Whole blood p-<br>value | Predicted e-OTLs:<br>Pancreas p value | Predicted e-OTLs:<br>Whole blood p<br>value |
|-------------------------|-------|-------------|------------------------------|-------------------|-------------------|---------------------|--------------------|----------------------------------------------|---------------------------------------|---------------------------------------------|
| rs4845618               | chr1  | 154427539   | 1.79E-02                     | 1.046             | T>G               | ADAR <sup>a,b</sup> | 4                  |                                              |                                       |                                             |
| rs7529229               | chr1  | 154448302   | 1.79E-02                     | 0.956             | T>C               | ADAR <sup>a,b</sup> | 2b                 |                                              |                                       |                                             |
| rs7553796               | chr1  | 154431930   | 8.50E-03                     | 1.0513            | C>A               | ADAR <sup>a,b</sup> | 2b                 |                                              |                                       |                                             |
| rs2228145               | chr1  | 154454494   | 8.50E-03                     | 0.9512            | A>C               | ADAR <sup>a,b</sup> | 4                  |                                              |                                       |                                             |
| rs4845371               | chr1  | 154435864   | 7.27E-03                     | 1.0523            | C>T               | ADAR <sup>a,b</sup> | 4                  |                                              |                                       |                                             |
| rs6667434               | chr1  | 154436624   | 7.27E-03                     | 1.0523            | G>A               | ADAR <sup>a,b</sup> | 5                  |                                              |                                       |                                             |
| rs4129267               | chr1  | 154453788   | 6.20E-03                     | 0.9493            | C>T               | ADAR <sup>a,b</sup> | 2b                 |                                              |                                       |                                             |
| rs4845625               | chr1  | 154449591   | 1.32E-03                     | 1.0629            | C>T               | ADAR <sup>a,b</sup> | 5                  |                                              |                                       | 0.019                                       |
| rs2229238               | chr1  | 154465420   | 4.37E-05                     | 1.0986            | C>T               | ADAR <sup>a,b</sup> | 4                  |                                              |                                       |                                             |
| rs6827840               | chr4  | 184423778   | 4.61E-03                     | 1.0887            | C>T               | CASP3               | 7                  |                                              |                                       |                                             |
| rs17075783 <sup>b</sup> | chr4  | 184404338   | 4.46E-03                     | 0.913             | T>C               | CASP3               | 3a                 |                                              | 0.028                                 |                                             |
| rs2968482               | chr16 | 88778025    | 1.88E-02                     | 1.0481            | T>C               | CYBA                | 2b                 |                                              |                                       |                                             |
| rs9788969               | chr16 | 88745842    | 1.79E-02                     | 0.956             | T>C               | CYBA                | 2b                 |                                              |                                       |                                             |
| rs3826076               | chr16 | 88714110    | 1.08E-02                     | 0.924             | C>T               | CYBA                | 2b                 |                                              |                                       |                                             |
| rs4782429 <sup>b</sup>  | chr16 | 88725689    | 4.21E-03                     | 0.9204            | G>A               | CYBA                | 5                  |                                              |                                       |                                             |
| rs2372914               | chr2  | 37037532    | 1.96E-02                     | 0.9589            | T>C               | EIF2AK2             | 6                  | 4.59E-5                                      |                                       |                                             |
| rs4233921               | chr2  | 37127006    | 1.43E-02                     | 0.9522            | C>T               | EIF2AK2             | 7                  | 8.32E-11                                     |                                       |                                             |
| rs6734118               | chr2  | 37332212    | 1.24E-02                     | 1.0565            | C>A               | EIF2AK2             | 6                  | 3.9E-8                                       |                                       | 0.00017                                     |
| rs2247010 <sup>b</sup>  | chr2  | 36984959    | 3.73E-03                     | 0.9436            | A>G               | EIF2AK2             | 7                  | 6.01E-7                                      |                                       |                                             |
| rs1446534 <sup>b</sup>  | chr8  | 116944800   | 1.69E-04                     | 0.924             | G>A               | EIF3H               | 7                  |                                              |                                       | 0.0064                                      |
| rs9927281               | chr16 | 11659567    | 1.90E-02                     | 0.9343            | G>A               | GSPT1               | 2b                 |                                              |                                       |                                             |
| rs350234 <sup>b</sup>   | chr16 | 12100497    | 1.64E-02                     | 1.0492            | A>G               | GSPT1               | 4                  |                                              |                                       |                                             |
| rs17710179              | chr2  | 162112761   | 1.93E-02                     | 1.1241            | A>G               | IFIH1 <sup>a</sup>  | 2b                 |                                              |                                       |                                             |
| rs79820653              | chr2  | 162154167   | 1.70E-02                     | 1.0768            | C>A               | IFIH1 <sup>a</sup>  | 5                  |                                              |                                       |                                             |
| rs74387251              | chr2  | 162167034   | 1.62E-02                     | 0.7603            | A>C               | IFIH1 <sup>a</sup>  | 7                  |                                              |                                       |                                             |
| rs7599142               | chr2  | 162136981   | 1.55E-02                     | 0.955             | C>T               | IFIH1 <sup>a</sup>  | 6                  |                                              |                                       |                                             |
| rs2080712               | chr2  | 162105419   | 1.45E-02                     | 1.045             | G>A               | IFIH1 <sup>a</sup>  | 6                  |                                              |                                       |                                             |
| rs77506733              | chr2  | 162445728   | 1.37E-02                     | 1.148             | T>C               | IFIH1 <sup>a</sup>  | 7                  |                                              |                                       |                                             |
| rs35744605              | chr2  | 162277580   | 1.34E-02                     | 0.7196            | G>T               | IFIH1 <sup>a</sup>  | 4                  |                                              |                                       |                                             |
| rs13022784              | chr2  | 162480693   | 1.30E-02                     | 1.0747            | A>G               | IFIH1 <sup>a</sup>  | 6                  |                                              |                                       |                                             |
| rs77446212              | chr2  | 162404017   | 1.29E-02                     | 1.0964            | T>G               | IFIH1 <sup>a</sup>  | 3a                 |                                              |                                       |                                             |
| rs16846296              | chr2  | 162109592   | 1.21E-02                     | 1.1366            | A>G               | IFIH1 <sup>a</sup>  | 7                  |                                              |                                       |                                             |
| rs73973006              | chr2  | 162141100   | 1.10E-02                     | 1.1298            | ?/?               | IFIH1 <sup>a</sup>  | 7                  |                                              |                                       |                                             |
| rs142735009             | chr2  | 162345514   | 1.00E-02                     | 0.7749            | ?/?               | IFIH1 <sup>a</sup>  | 3a                 |                                              |                                       |                                             |
| rs77088072              | chr2  | 162294461   | 9.94E-03                     | 0.7929            | G>A               | IFIH1 <sup>a</sup>  | 5                  |                                              | 0.0014                                | 0.0043                                      |
| rs11885343              | chr2  | 162112363   | 8.50E-03                     | 0.9512            | C>T               | IFIH1 <sup>a</sup>  | 3a                 |                                              |                                       |                                             |
| rs11897585              | chr2  | 162113152   | 8.50E-03                     | 0.9512            | A>G               | IFIH1 <sup>a</sup>  | 2b                 |                                              |                                       |                                             |
| rs11886859              | chr2  | 162113193   | 8.50E-03                     | 0.9512            | C>G               | IFIH1 <sup>a</sup>  | 4                  |                                              |                                       |                                             |
| rs10185053              | chr2  | 162115829   | 8.50E-03                     | 0.9512            | A>G               | IFIH1 <sup>a</sup>  | 5                  |                                              |                                       |                                             |
| rs10185151              | chr2  | 162115875   | 8.50E-03                     | 0.9512            | A>G               | IFIH1 <sup>a</sup>  | 5                  |                                              |                                       |                                             |
| rs12052431              | chr2  | 162118887   | 8.50E-03                     | 0.9512            | C>T               | IFIH1 <sup>a</sup>  | 4                  |                                              |                                       |                                             |
| rs10174693              | chr2  | 162119581   | 8.50E-03                     | 0.9512            | C>A               | IFIH1 <sup>a</sup>  | 7                  |                                              |                                       |                                             |
| rs17762054              | chr2  | 162154176   | 8.46E-03                     | 1.1712            | T>C               | IFIH1 <sup>a</sup>  | 5                  |                                              |                                       |                                             |

|             |      |           |          |        |     |                    |    |       |  |
|-------------|------|-----------|----------|--------|-----|--------------------|----|-------|--|
| rs2892826   | chr2 | 162111748 | 7.27E-03 | 0.9503 | C>A | IFIH1 <sup>a</sup> | 5  |       |  |
| rs6432709   | chr2 | 162117382 | 7.27E-03 | 0.9503 | A>C | IFIH1 <sup>a</sup> | 6  |       |  |
| rs10171070  | chr2 | 162118368 | 7.27E-03 | 0.9503 | C>T | IFIH1 <sup>a</sup> | 4  |       |  |
| rs2075300   | chr2 | 162118466 | 7.27E-03 | 0.9503 | T>C | IFIH1 <sup>a</sup> | 3a |       |  |
| rs10180049  | chr2 | 162136962 | 7.27E-03 | 0.9503 | G>A | IFIH1 <sup>a</sup> | 6  |       |  |
| rs10209700  | chr2 | 162138649 | 7.27E-03 | 0.9503 | A>G | IFIH1 <sup>a</sup> | 7  |       |  |
| rs13422273  | chr2 | 162273547 | 6.85E-03 | 0.7672 | ?/? | IFIH1 <sup>a</sup> | 6  |       |  |
| rs888274    | chr2 | 162481139 | 6.39E-03 | 0.9418 | C>T | IFIH1 <sup>a</sup> | 5  | 0.033 |  |
| rs2241242   | chr2 | 162118384 | 6.20E-03 | 0.9493 | G>A | IFIH1 <sup>a</sup> | 4  |       |  |
| rs10171915  | chr2 | 162118993 | 6.20E-03 | 0.9493 | G>T | IFIH1 <sup>a</sup> | 2b |       |  |
| rs2389681   | chr2 | 162134737 | 6.20E-03 | 0.9493 | G>T | IFIH1 <sup>a</sup> | 7  |       |  |
| rs2111489   | chr2 | 162135165 | 6.20E-03 | 0.9493 | T>G | IFIH1 <sup>a</sup> | 6  |       |  |
| rs1558862   | chr2 | 162135374 | 6.20E-03 | 0.9493 | A>T | IFIH1 <sup>a</sup> | 6  |       |  |
| rs2241243   | chr2 | 162118677 | 5.28E-03 | 0.9484 | G>A | IFIH1 <sup>a</sup> | 2b |       |  |
| rs12692647  | chr2 | 162122301 | 5.28E-03 | 0.9484 | C>T | IFIH1 <sup>a</sup> | 7  |       |  |
| rs10930043  | chr2 | 162123411 | 5.28E-03 | 0.9484 | A>G | IFIH1 <sup>a</sup> | 5  |       |  |
| rs10490423  | chr2 | 162125936 | 5.28E-03 | 0.9484 | C>T | IFIH1 <sup>a</sup> | 5  |       |  |
| rs35596334  | chr2 | 162132318 | 5.28E-03 | 0.9484 | C>T | IFIH1 <sup>a</sup> | 7  |       |  |
| rs2389680   | chr2 | 162133393 | 5.28E-03 | 0.9484 | A>G | IFIH1 <sup>a</sup> | 6  |       |  |
| rs2216338   | chr2 | 162133458 | 5.28E-03 | 0.9484 | G>A | IFIH1 <sup>a</sup> | 7  |       |  |
| rs7564122   | chr2 | 162134217 | 5.28E-03 | 0.9484 | A>G | IFIH1 <sup>a</sup> | 7  |       |  |
| rs79475499  | chr2 | 162192461 | 4.98E-03 | 1.1411 | C>A | IFIH1 <sup>a</sup> | 5  |       |  |
| rs34382064  | chr2 | 162384634 | 4.65E-03 | 1.1618 | C>A | IFIH1 <sup>a</sup> | 5  |       |  |
| rs62189714  | chr2 | 162110331 | 4.48E-03 | 0.9474 | C>A | IFIH1 <sup>a</sup> | 5  |       |  |
| rs10198168  | chr2 | 162119481 | 4.48E-03 | 0.9474 | A>T | IFIH1 <sup>a</sup> | 7  |       |  |
| rs7607713   | chr2 | 162133780 | 4.48E-03 | 0.9474 | G>A | IFIH1 <sup>a</sup> | 7  |       |  |
| rs7568666   | chr2 | 162133859 | 4.48E-03 | 0.9474 | T>C | IFIH1 <sup>a</sup> | 7  |       |  |
| rs80063898  | chr2 | 162164613 | 4.36E-03 | 1.1434 | C>G | IFIH1 <sup>a</sup> | 7  |       |  |
| rs2193495   | chr2 | 162125628 | 3.79E-03 | 0.9465 | T>C | IFIH1 <sup>a</sup> | 6  |       |  |
| rs7598422   | chr2 | 162136221 | 3.20E-03 | 0.9455 | G>T | IFIH1 <sup>a</sup> | 7  |       |  |
| rs77693762  | chr2 | 162422765 | 2.23E-03 | 0.8985 | C>T | IFIH1 <sup>a</sup> | 5  |       |  |
| rs62188206  | chr2 | 162488054 | 2.15E-03 | 0.9148 | G>T | IFIH1 <sup>a</sup> | 5  |       |  |
| rs75166367  | chr2 | 162107791 | 1.90E-03 | 1.1252 | G>A | IFIH1 <sup>a</sup> | 4  |       |  |
| rs17728270  | chr2 | 162440681 | 1.75E-03 | 1.1019 | T>C | IFIH1 <sup>a</sup> | 7  |       |  |
| rs977907    | chr2 | 162221345 | 1.71E-03 | 1.148  | T>A | IFIH1 <sup>a</sup> | 4  |       |  |
| rs71424730  | chr2 | 162184894 | 1.45E-03 | 1.1286 | A>G | IFIH1 <sup>a</sup> | 3a |       |  |
| rs34298676  | chr2 | 162269807 | 1.43E-03 | 1.1252 | A>G | IFIH1 <sup>a</sup> | 7  |       |  |
| rs35732034  | chr2 | 162268086 | 1.37E-03 | 0.7054 | C>T | IFIH1 <sup>a</sup> | 7  |       |  |
| rs17715343  | chr2 | 162311236 | 1.22E-03 | 0.8958 | C>G | IFIH1 <sup>a</sup> | 7  |       |  |
| rs17713557  | chr2 | 162260675 | 9.76E-04 | 1.1298 | G>T | IFIH1 <sup>a</sup> | 5  |       |  |
| rs35701596  | chr2 | 162232496 | 8.04E-04 | 1.132  | G>T | IFIH1 <sup>a</sup> | 6  |       |  |
| rs5649      | chr2 | 162147348 | 7.73E-04 | 0.6288 | C>T | IFIH1 <sup>a</sup> | 5  |       |  |
| rs114779135 | chr2 | 162120286 | 6.96E-04 | 1.1688 | A>C | IFIH1 <sup>a</sup> | 4  |       |  |
| rs71424731  | chr2 | 162218378 | 6.61E-04 | 1.1343 | T>C | IFIH1 <sup>a</sup> | 6  |       |  |
| rs145769275 | chr2 | 162251238 | 4.77E-04 | 0.7695 | ?/? | IFIH1 <sup>a</sup> | 7  |       |  |
| rs35696140  | chr2 | 162469314 | 2.09E-04 | 0.9148 | A>G | IFIH1 <sup>a</sup> | 4  |       |  |
| rs41368446  | chr2 | 162141603 | 1.82E-04 | 1.14   | T>G | IFIH1 <sup>a</sup> | 6  |       |  |
| rs13416088  | chr2 | 162141149 | 1.07E-04 | 0.9112 | G>A | IFIH1 <sup>a</sup> | 7  |       |  |
| rs3764917   | chr2 | 162173826 | 8.98E-05 | 0.9103 | T>C | IFIH1 <sup>a</sup> | 6  |       |  |
| rs72871627  | chr2 | 162280432 | 8.21E-05 | 0.6825 | A>G | IFIH1 <sup>a</sup> | 6  |       |  |
| rs17716942  | chr2 | 162404181 | 3.43E-05 | 0.8905 | T>C | IFIH1 <sup>a</sup> | 4  |       |  |
| rs13432094  | chr2 | 162339378 | 3.21E-05 | 0.8538 | A>T | IFIH1 <sup>a</sup> | 7  |       |  |
| rs76684000  | chr2 | 162445184 | 6.07E-06 | 0.827  | ?/? | IFIH1 <sup>a</sup> | 7  |       |  |

|                          |       |           |          |        |     |                     |    |          |          |          |
|--------------------------|-------|-----------|----------|--------|-----|---------------------|----|----------|----------|----------|
| rs114165927              | chr2  | 162261394 | 5.02E-06 | 0.8369 | G>C | IFIH1 <sup>a</sup>  | 2b |          |          |          |
| rs13422767               | chr2  | 162243749 | 5.33E-08 | 0.8728 | G>A | IFIH1 <sup>a</sup>  | 7  |          | 0.015    |          |
| rs13022749               | chr2  | 162415697 | 1.60E-08 | 0.8932 | T>A | IFIH1 <sup>a</sup>  | 5  |          |          | 0.0051   |
| rs2075302                | chr2  | 162219636 | 1.46E-08 | 1.1074 | T>C | IFIH1 <sup>a</sup>  | 5  |          |          |          |
| rs11679244               | chr2  | 162225885 | 1.05E-08 | 1.1085 | C>A | IFIH1 <sup>a</sup>  | 6  |          |          |          |
| rs3788964                | chr2  | 162350970 | 3.99E-09 | 0.8581 | T>C | IFIH1 <sup>a</sup>  | 7  |          | 0.028    |          |
| rs7587426                | chr2  | 162353833 | 5.28E-10 | 0.8887 | T>C | IFIH1 <sup>a</sup>  | 7  |          |          |          |
| rs7608315                | chr2  | 162357213 | 9.56E-11 | 0.8843 | A>C | IFIH1 <sup>a</sup>  | 7  |          |          | 0.025    |
| rs3747517                | chr2  | 162272314 | 4.98E-11 | 0.8711 | C>T | IFIH1 <sup>a</sup>  | 7  |          | 0.035    | 0.022    |
| rs35667974               | chr2  | 162268127 | 1.01E-11 | 0.5724 | ?/? | IFIH1 <sup>a</sup>  | 7  |          |          |          |
| rs1549020                | chr2  | 162384337 | 2.56E-12 | 0.8633 | T>G | IFIH1 <sup>a</sup>  | 6  |          |          | 0.0048   |
| rs13023380               | chr2  | 162297853 | 2.56E-12 | 0.8755 | A>G | IFIH1 <sup>a</sup>  | 3a |          |          | 0.046    |
| rs2068330                | chr2  | 162380880 | 3.64E-16 | 0.8496 | C>G | IFIH1 <sup>a</sup>  | 6  |          |          | 0.023    |
| rs984971                 | chr2  | 162368011 | 2.40E-16 | 0.8487 | A>G | IFIH1 <sup>a</sup>  | 7  |          |          | 0.025    |
| rs1990760                | chr2  | 162267541 | 5.84E-17 | 0.853  | T>C | IFIH1 <sup>a</sup>  | 7  |          |          |          |
| rs2111485                | chr2  | 162254026 | 3.81E-18 | 0.8479 | G>A | IFIH1 <sup>a</sup>  | 7  |          |          |          |
| rs3993797                | chr11 | 511580    | 1.64E-02 | 0.8869 | C>T | IFITM1              | 4  |          |          |          |
| rs2834136 <sup>b</sup>   | chr21 | 33200486  | 1.36E-02 | 0.8538 | G>A | IFNAR1 <sup>a</sup> | 6  |          |          |          |
| rs2834136 <sup>b</sup>   | chr21 | 33200486  | 1.36E-02 | 0.8538 | G>A | IFNAR2              | 6  |          |          |          |
| rs7316231                | chr12 | 68075862  | 1.79E-02 | 1.046  | A>G | IFNG <sup>a</sup>   | 5  | 0.0015   |          |          |
| rs4913395                | chr12 | 68076705  | 1.79E-02 | 1.046  | T>C | IFNG <sup>a</sup>   | 6  | 0.0023   |          |          |
| rs11614178               | chr12 | 68114342  | 1.55E-02 | 0.955  | G>A | IFNG <sup>a</sup>   | 7  | 2.02E-4  |          |          |
| rs7132610 <sup>p</sup>   | chr12 | 68114875  | 3.18E-03 | 1.1252 | T>A | IFNG <sup>a</sup>   | 5  |          |          |          |
| rs11123914               | chr2  | 102230272 | 1.30E-02 | 0.9259 | ?/? | IL1R1               | 5  |          | 7.60E-08 |          |
| rs1558647                | chr2  | 102193725 | 7.42E-03 | 0.9204 | ?/? | IL1R1               | 5  |          | 1.60E-07 |          |
| rs1922294                | chr2  | 102219449 | 7.42E-03 | 0.9204 | ?/? | IL1R1               | 7  |          | 1.60E-07 |          |
| rs6731416 <sup>b</sup>   | chr2  | 101911513 | 6.70E-03 | 0.7543 | T>C | IL1R1               | 7  |          |          |          |
| rs7565504 <sup>b</sup>   | chr2  | 101917865 | 6.70E-03 | 0.7543 | A>G | IL1R1               | 5  |          |          |          |
| rs140672656 <sup>b</sup> | chr2  | 101918850 | 6.33E-03 | 0.7843 | ?/? | IL1R1               | 6  |          |          |          |
| rs79184888 <sup>b</sup>  | chr2  | 101955759 | 5.83E-03 | 0.7528 | G>A | IL1R1               | 7  |          |          |          |
| rs4850992 <sup>b</sup>   | chr2  | 101987400 | 5.58E-03 | 0.7475 | A>G | IL1R1               | 4  |          |          |          |
| rs3993797 <sup>b</sup>   | chr11 | 511580    | 1.64E-02 | 0.8869 | C>T | IRF7 <sup>a</sup>   |    |          |          |          |
| rs17758 <sup>b</sup>     | chr11 | 644325    | 1.01E-02 | 0.8659 | G>A | IRF7 <sup>a</sup>   | 4  |          |          |          |
| rs118067545 <sup>b</sup> | chr11 | 682373    | 8.48E-03 | 0.8361 | C>T | IRF7 <sup>a</sup>   | 5  |          |          |          |
| rs7278439                | chr21 | 41606174  | 1.24E-02 | 0.9512 | C>T | MX1 <sup>a</sup>    | 4  |          |          |          |
| rs2838069                | chr21 | 41598049  | 1.15E-02 | 0.9531 | C>A | MX1 <sup>a</sup>    | 5  |          |          |          |
| rs7278439 <sup>b</sup>   | chr21 | 41606174  | 1.24E-02 | 0.9512 | C>T | MX2 <sup>a,b</sup>  | 4  |          | 0.012    |          |
| rs2838069                | chr21 | 41598049  | 1.15E-02 | 0.9531 | C>A | MX2 <sup>a,b</sup>  | 5  |          |          |          |
| rs2066843                | chr16 | 50711288  | 1.96E-02 | 1.0502 | C>T | NOD2                | 5  |          |          | 1.70E-12 |
| rs17313265               | chr16 | 50713793  | 1.96E-02 | 1.0502 | C>T | NOD2                | 3a |          |          | 2.40E-12 |
| rs1548914                | chr16 | 50445460  | 8.91E-03 | 0.9343 | A>C | NOD2                | 5  |          |          |          |
| rs2302759 <sup>b</sup>   | chr16 | 50793690  | 4.11E-03 | 0.9361 | G>A | NOD2                | 5  |          | 0.014    | 4.40E-07 |
| rs1034687 <sup>b</sup>   | chr12 | 112732362 | 2.16E-07 | 0.8694 | G>A | OAS1 <sup>a</sup>   | 7  | 2.19E-11 |          |          |
| rs1015249 <sup>b</sup>   | chr12 | 112687506 | 1.25E-07 | 0.8949 | C>A | OAS1 <sup>a</sup>   | 5  | 2.7E-13  |          |          |
| rs4767000 <sup>b</sup>   | chr12 | 112730563 | 1.03E-09 | 1.123  | G>A | OAS1 <sup>a</sup>   | 7  |          |          |          |
| rs739744 <sup>b</sup>    | chr12 | 112747657 | 1.03E-09 | 1.123  | A>G | OAS1 <sup>a</sup>   | 7  | 1.11E-21 |          |          |
| rs1034687 <sup>b</sup>   | chr12 | 112732362 | 2.16E-07 | 0.8694 | G>A | OAS2 <sup>a</sup>   | 7  |          |          |          |
| rs4767000 <sup>b</sup>   | chr12 | 112730563 | 1.03E-09 | 1.123  | G>A | OAS2 <sup>a</sup>   | 7  |          |          |          |
| rs739744 <sup>b</sup>    | chr12 | 112747657 | 1.03E-09 | 1.123  | A>G | OAS2 <sup>a</sup>   | 7  |          |          |          |
| rs1034687 <sup>b</sup>   | chr12 | 112732362 | 2.16E-07 | 0.8694 | G>A | OAS3 <sup>a</sup>   | 7  |          | 0.013    |          |
| rs4767000 <sup>b</sup>   | chr12 | 112730563 | 1.03E-09 | 1.123  | G>A | OAS3 <sup>a</sup>   | 7  |          |          |          |
| rs739744 <sup>b</sup>    | chr12 | 112747657 | 1.03E-09 | 1.123  | A>G | OAS3 <sup>a</sup>   | 7  | 1.32E-4  |          |          |
| rs17125267 <sup>b</sup>  | chr12 | 53277466  | 1.03E-02 | 0.8378 | C>T | SP1                 | 5  |          |          |          |

|                         |       |          |          |        |     |          |    |  |       |
|-------------------------|-------|----------|----------|--------|-----|----------|----|--|-------|
| rs11170466              | chr12 | 53192075 | 1.47E-05 | 1.1841 | G>A | SP1      | 4  |  |       |
| rs2286596               | chr12 | 6443889  | 1.64E-02 | 0.9531 | A>G | TNFRSF1A | 1d |  |       |
| rs61311839              | chr12 | 6413035  | 1.15E-02 | 0.9531 | ?/? | TNFRSF1A | 5  |  | 0.048 |
| rs4764589               | chr12 | 6423116  | 8.50E-03 | 0.9512 | ?/? | TNFRSF1A | 5  |  |       |
| rs4764590               | chr12 | 6423184  | 8.50E-03 | 0.9512 | ?/? | TNFRSF1A | 7  |  |       |
| rs749930                | chr12 | 6311347  | 7.10E-03 | 1.0725 | C>T | TNFRSF1A | 4  |  |       |
| rs2250430               | chr12 | 6312008  | 4.37E-03 | 1.0587 | T>A | TNFRSF1A | 4  |  |       |
| rs7300535               | chr12 | 6410971  | 2.70E-03 | 0.9418 | ?/? | TNFRSF1A | 6  |  |       |
| rs11064182              | chr12 | 6418071  | 2.70E-03 | 0.9446 | ?/? | TNFRSF1A | 5  |  |       |
| rs7961280               | chr12 | 6418903  | 2.70E-03 | 0.9446 | ?/? | TNFRSF1A | 4  |  |       |
| rs11064180              | chr12 | 6414083  | 2.27E-03 | 0.9436 | ?/? | TNFRSF1A | 5  |  |       |
| rs12812284              | chr12 | 6417451  | 1.90E-03 | 0.9427 | ?/? | TNFRSF1A | 5  |  |       |
| rs10849451 <sup>b</sup> | chr12 | 6415513  | 1.59E-03 | 1.0618 | ?/? | TNFRSF1A | 6  |  | 0.028 |
| rs10849453              | chr12 | 6419086  | 1.10E-03 | 0.9399 | ?/? | TNFRSF1A | 5  |  |       |
| rs2364482               | chr12 | 6392965  | 6.96E-04 | 0.925  | T>G | TNFRSF1A | 3a |  |       |
| rs12296430              | chr12 | 6394334  | 5.44E-04 | 0.9204 | ?/? | TNFRSF1A | 4  |  |       |
| rs11671087              | chr19 | 39271150 | 6.39E-03 | 0.9418 | T>C | ZFP36    | 5  |  |       |
| rs7359953               | chr19 | 39273073 | 6.39E-03 | 0.9418 | G>A | ZFP36    | 5  |  |       |
| rs7359950               | chr19 | 39273125 | 6.39E-03 | 0.9418 | C>T | ZFP36    | 5  |  |       |



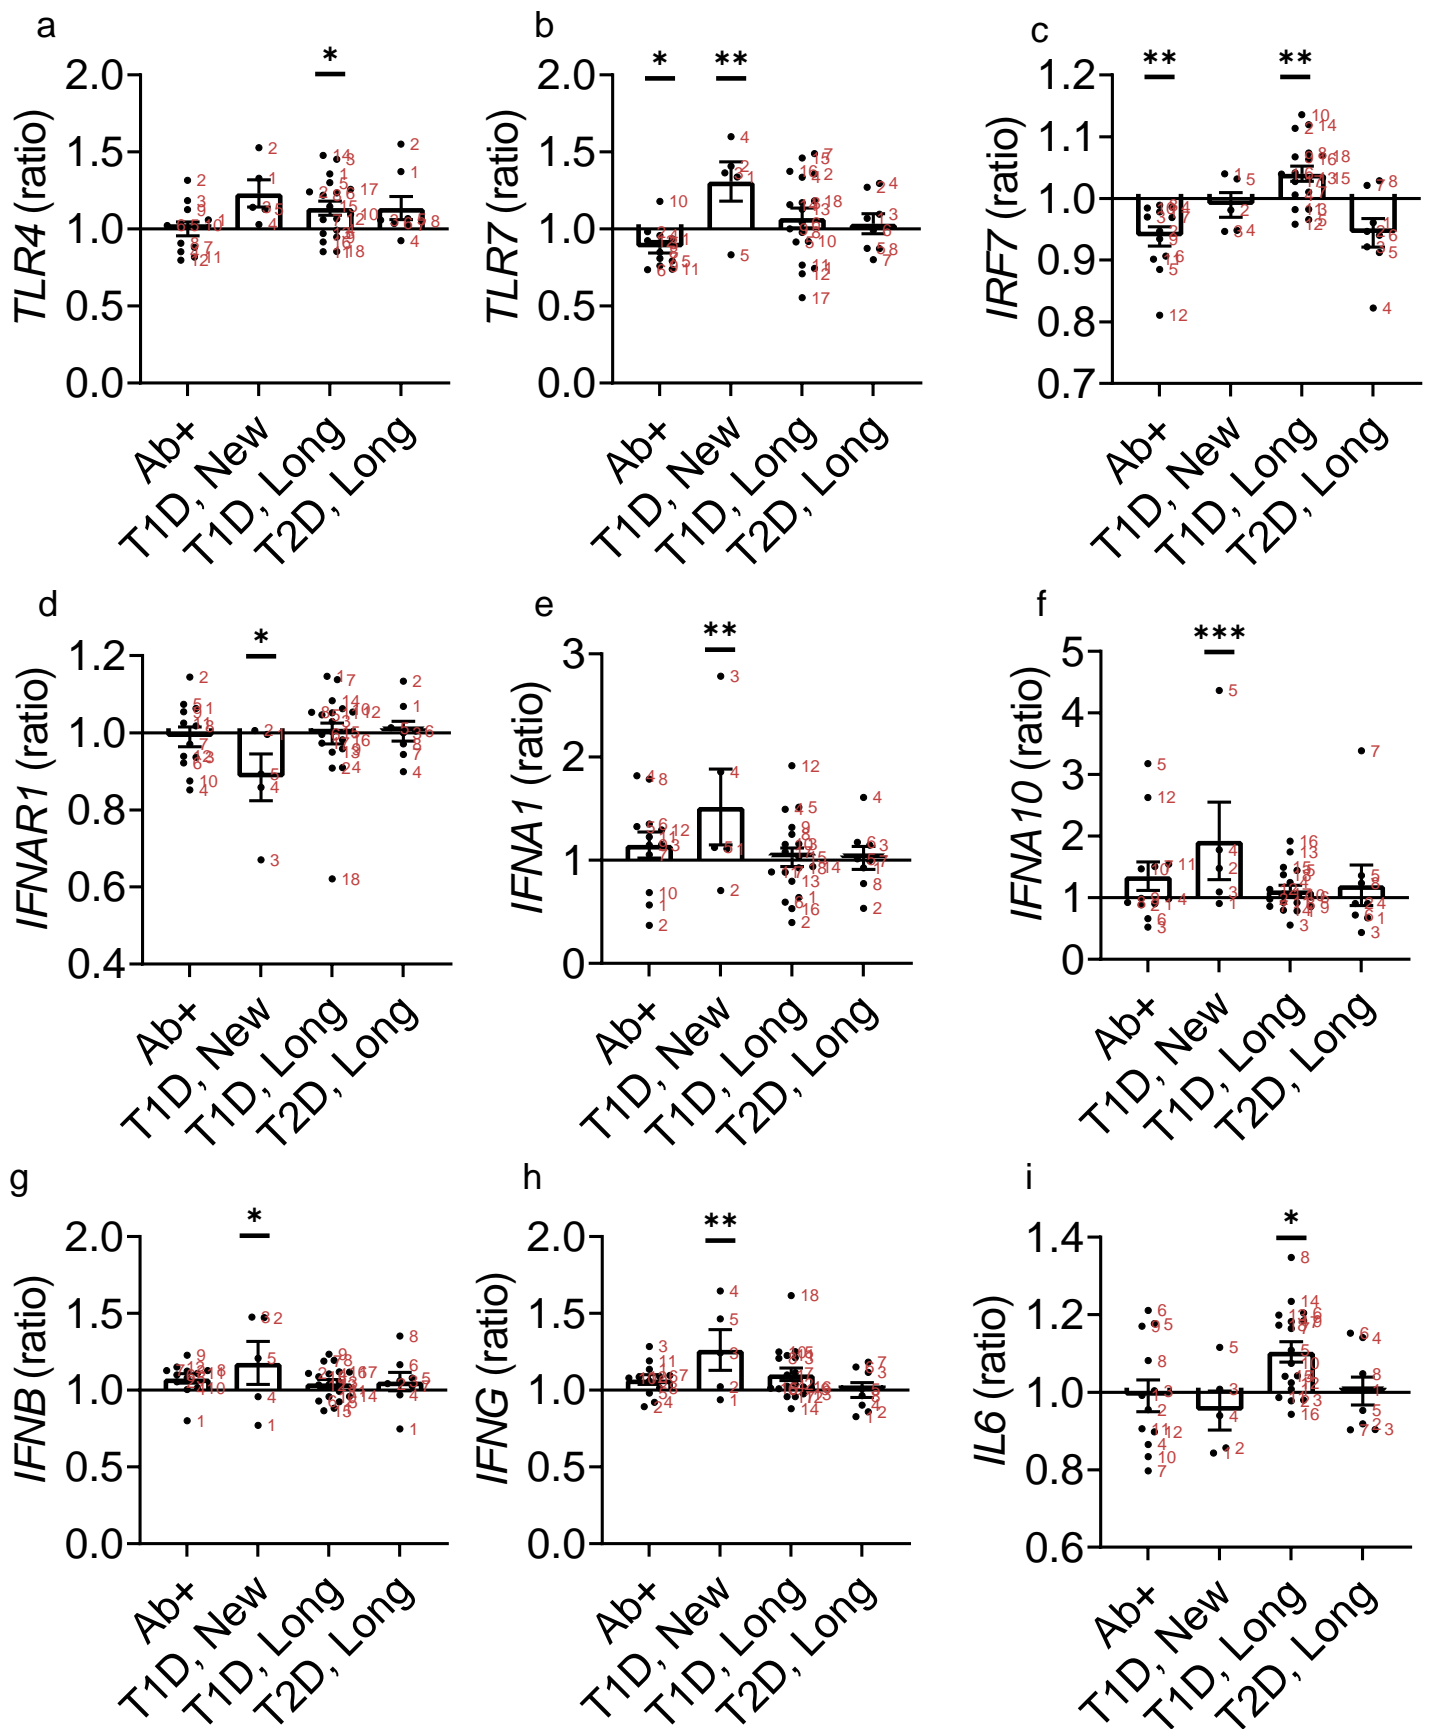

ESM Fig. 1 Genes involved in PAMP recognition and IFN induction. The RNA expression levels of TLR4 (a), TLR7 (b), IRF7 (c), IFNAR1 (d), IFNA1 (e), IFNA10 (f), IFNB (g), IFNG (h) and IL6 (i) were transformed, and a mean was calculated. The ratio between the mean expression level in each group (autoantibody-positive [Ab+], new-onset type 1 diabetes [T1D, New], longstanding type 1 diabetes [T1D, Long], longstanding type 2 diabetes [T2D, Long]) and the non-diabetic control group was graphed. \* $p < 0.05$ , \*\* $p < 0.01$  and \*\*\* $p < 0.001$  vs control group. Each data point is numbered for comparison with demographic features, HLA and autantibody status in ESM Table 2.

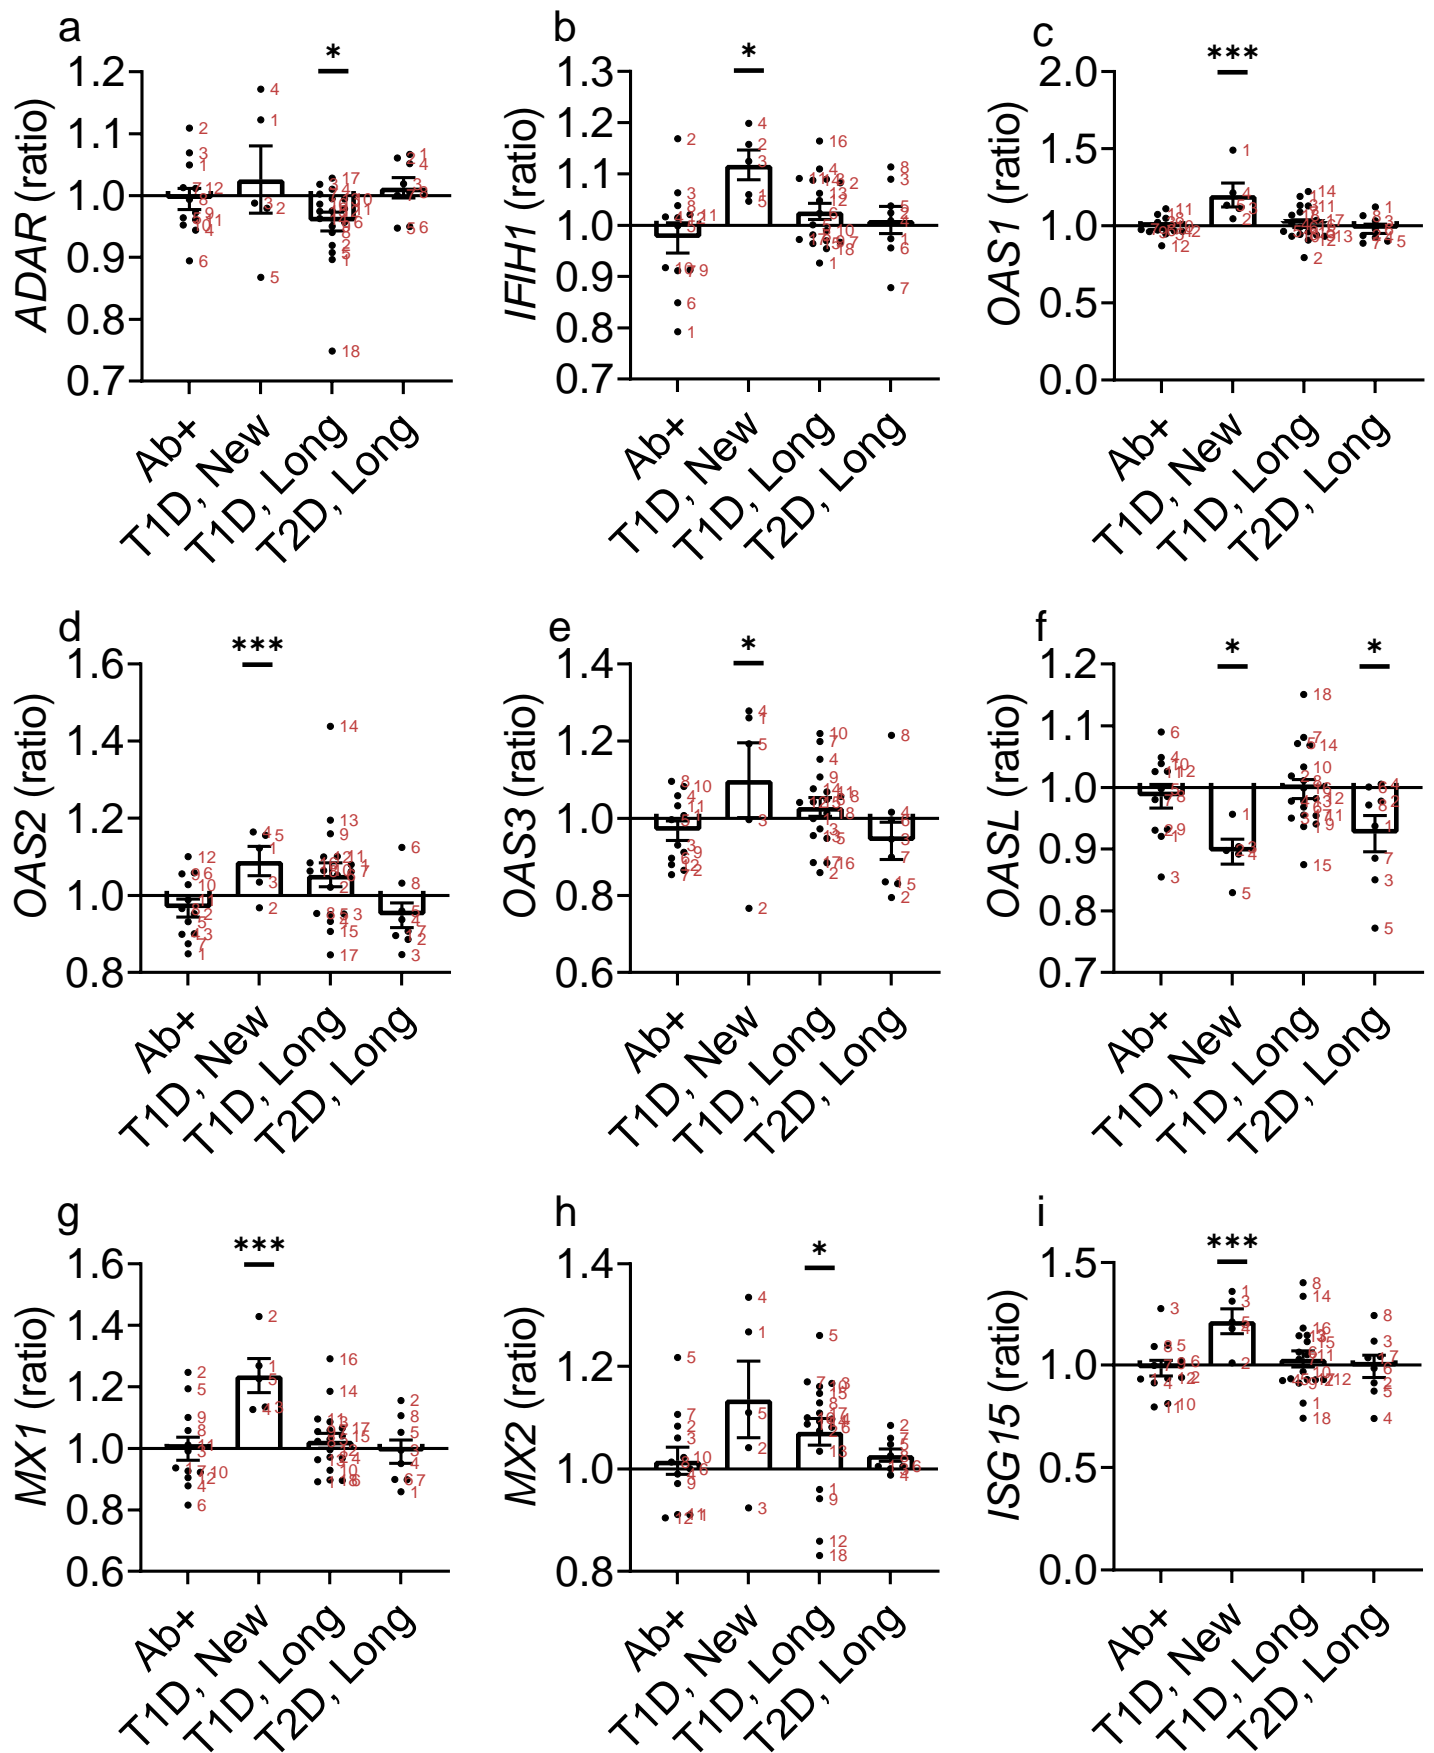

ESM Fig. 2 Cytokine genes and ISGs that were upregulated by IFN induction. The RNA expression levels of ADAR (a), IFIH1 (b), OAS1 (c), OAS2 (d), OAS3 (e), OASL (f), MX1 (g), MX2 (h) and ISG15 (i) were transformed, and a mean was calculated. The ratio between the mean expression level in each group (autoantibody-positive [Ab+], new-onset type 1 diabetes [T1D, New], longstanding type 1 diabetes [T1D, Long], longstanding type 2 diabetes [T2D, Long]) and the non-diabetic control group was graphed. \* $p < 0.05$  and \*\*\* $p < 0.001$  vs control group. Each data point is numbered for comparison with demographic features, HLA and autantibody status in ESM Table 2.
